# Supplementary material for: Relating surface defect energetics with reactant gas adsorption during the photo-catalytic reduction of CO2 by partially hydrolyzed In2O3 nanorods
Source: Royal Society of Chemistry journal article supplement (doi:10.1039/d0cp03217d), 2020-01-01
Supplement: d0cp03217d1.pdf [file d0cp03217d1.pdf]

**Supplementary Information to “Relating Surface Defect energetics with Reactant Gas Adsorption during the Photo-catalytic Reduction of CO<sub>2</sub> by partially hydrolyzed In<sub>2</sub>O<sub>3</sub> Nanorods”.**

**Material Synthesis and other discussion**

The In<sub>2</sub>O<sub>3-x</sub>OH<sub>y</sub> nanorod structures were fabricated through the following steps: 0.397g of InCl<sub>3</sub> was dissolved in 6ml ethanol with stirring, a separate mixture of 2.5ml NH<sub>3</sub>OH and 7.5ml ethanol and 2ml H<sub>2</sub>O was mixed in the InCl<sub>3</sub>, creating a white suspension. To control for uniform size distributions, the white suspension was immersed in a heated oil bath at 80°C with stirring for 10 minutes. The suspension was then centrifuged; removal of excess solvent and subsequently washed with deionized water. This step was done 3 times, before a vacuum drying procedure of 70°C at 12 hours. The dried powder was then calcined for 12 hours at 250°C to form the In<sub>2</sub>O<sub>3-x</sub>OH<sub>y</sub> phase nanorod structures. The nanorods have an averaged 13-15 nm diameter, and BET derived surface area of 129m<sup>2</sup>/g.

The FTIR phase transition study<sup>1</sup> showed that during the onset of thermal dehydration from 200-225°C, the set of peaks associated with edge sharing In-OH rapidly decay, but also showed the introduction of new types of In-OH centres with bending and stretching modes at 915cm<sup>-1</sup> / 975 cm<sup>-1</sup> and 3437cm<sup>-1</sup> / 3650cm<sup>-1</sup>, respectively, which disappeared at 400°C. This correlates with our earlier principal findings: that CO<sub>2</sub> reduction products were detected with In(OH)<sub>3</sub> dehydrolyzed at 250°C but not below, and that the CO product rates decrease with increasing temperature from 250°C to 450°C, where no CO was detected with samples annealed above 450°C. Because the IR signals associated with the original OH bridging disappeared completely at 225°C, we associate the new OH peaks as interstructural hydrogen bonding with lattice oxygen sites to form terminal In-OH groups.

The approximately 2:1 peak area ratio of OH type groups to O<sub>vac</sub> in manuscript **Figure 3a**, indicate that the protonation of lattice oxygen is necessary to minimize net surface charge during de-hydrolyzation at the transitional phase boundary, which can indicate that the oxygen vacancies are intrinsically singly ionized, through an elementary reaction of an hydrogen adatom and lattice oxygen site after water dissociation by ambient moisture adsorption on the surface:  $H^+ + O_L^{2-} \rightarrow OH + e^-$ , an electron can be injected into any intrinsically doubly positively charged  $O_{vac}^{**}$  site and the 1:1 OH:O<sub>vac</sub> ratio thus indicates that two electrons are injected for every  $O_{vac}^{**}$  to form singly ionized  $O_{vac}^{\bullet}$ . This is validated by electron paramagnetic resonance results, where the EPR spectra for indium oxide is typically associated with singly ionized oxygen vacancies.

## DRIFTS in CO<sub>2</sub>

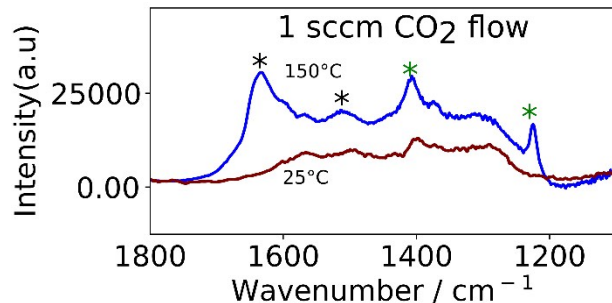

**SI Figure 1.** Bidentate (1632 cm<sup>-1</sup>, 1564 cm<sup>-1</sup>) (black asterisks) and monodentate (1403 cm<sup>-1</sup> and 1511 cm<sup>-1</sup>) (green asterisks) carbonate species observed in 1sccm CO<sub>2</sub> flow.

## XPS results

|                                               | O <sub>L</sub> | O <sub>vac</sub> | OH      | H <sup>+</sup> OH |
|-----------------------------------------------|----------------|------------------|---------|-------------------|
| Vacuum                                        | 0.53           | 0.19             | 0.18    | 0.11              |
| H <sub>2</sub> , dark/25C                     | 0.19           | 0.19             | 0.35    | 0.27              |
| H <sub>2</sub> , dark/150C                    | 0.36           | 0.17             | 0.25    | 0.22              |
| H <sub>2</sub> , light/150°C                  | 0.17           | 0.16             | 0.41    | 0.26              |
|                                               | O <sub>L</sub> | O <sub>vac</sub> | OH / CO | H <sup>+</sup> OH |
| CO <sub>2</sub> +H <sub>2</sub> , dark/25°C   | 0.34           | 0.14             | 0.34    | 0.18              |
| CO <sub>2</sub> +H <sub>2</sub> , dark/150°C  | 0.38           | 0.18             | 0.25    | 0.19              |
| CO <sub>2</sub> +H <sub>2</sub> , light/150°C | 0.36           | 0.13             | 0.33    | 0.18              |

**SI Table 1.** Fractional amount (of the entire O1s spectrum) of O1s species for In<sub>2</sub>O<sub>3-x</sub>(OH)<sub>y</sub> nanorods under vacuum and CO<sub>2</sub>+ H<sub>2</sub> conditions.

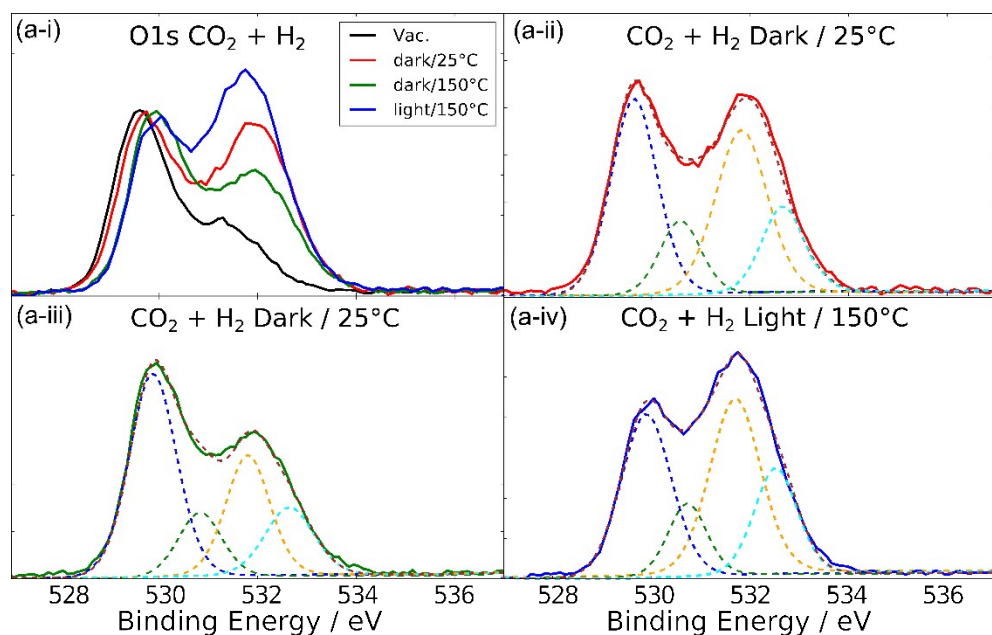

**SI Figure 2.** (a-i) O1s spectra for H<sub>2</sub>+CO<sub>2</sub> and deconvolution for dark ambient temperature (a-ii), dark thermal condition (a-iii), and photo-thermal condition (a-iv).

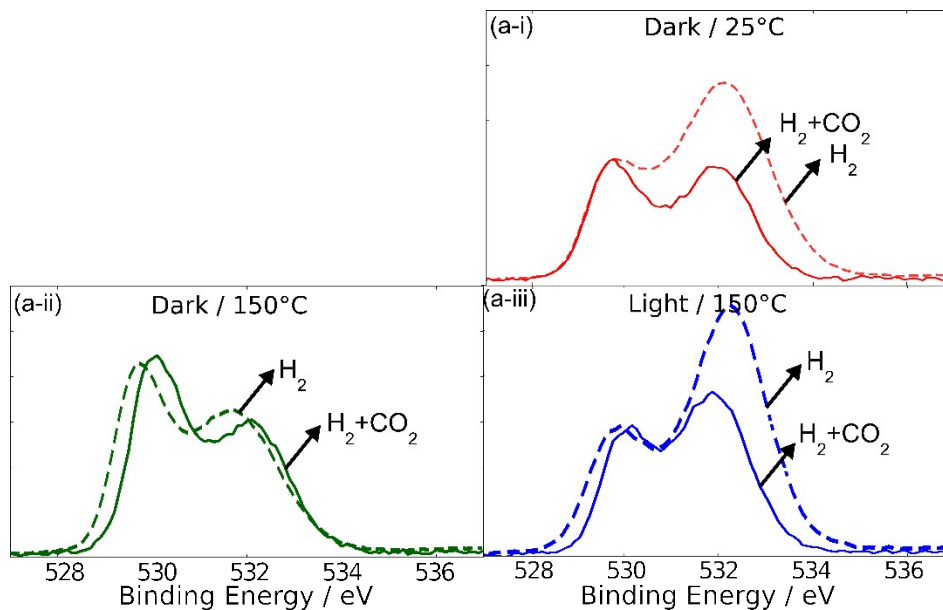

**SI Figure 3.** Comparison of the O1s spectra between H<sub>2</sub> and H<sub>2</sub>+CO<sub>2</sub> under dark ambient temperature, dark 150°C and photo-illuminated 150°C.

#### DRIFTS in H<sub>2</sub>+CO<sub>2</sub>

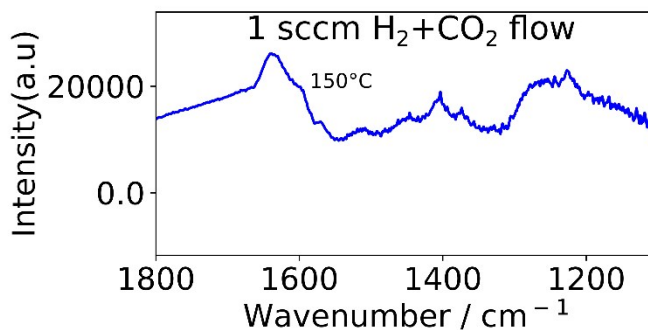

**SI Figure 4.** Bidentate and monodentate (green asterisks) carbonate species observed in 1sccm CO<sub>2</sub> and 1sccm H<sub>2</sub> flow. However, the amount of monodentate species is less prevalent than in the CO<sub>2</sub> only case, which agrees with the XPS C1s spectrum showing the removal of O=C-O species under thermal condition.

#### EPR results

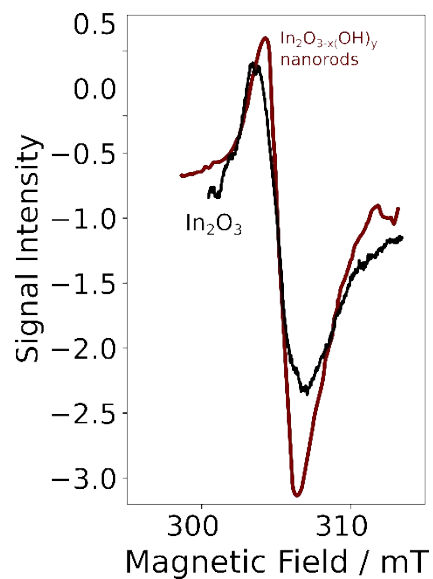

SI Figure 5. EPR measurements of ~0.5mg each of commercially purchased In<sub>2</sub>O<sub>3</sub> powder (SpecPure™) and synthesized In<sub>2</sub>O<sub>3-x</sub>(OH)<sub>y</sub> nanorods. The EPR signals in In<sub>2</sub>O<sub>3</sub> materials are typically associated with singly ionized oxygen vacancies. The signal detected for the In<sub>2</sub>O<sub>3</sub> is smaller, which indicates a higher population of defects for the In<sub>2</sub>O<sub>3-x</sub>(OH)<sub>y</sub> photo-catalyst material.
